# Supplementary material for: Investigation of particle manipulation mechanism and size sorting strategy in a double-layered microchannel
Source: Royal Society of Chemistry journal article supplement (doi:10.1039/d2lc00822j), 2022-01-01
Supplement: d2lc00822j1.pdf [file d2lc00822j1.pdf]

# Investigation of Particle Manipulation Mechanism and Size Sorting Strategy in Double-layered Microchannel

Zhang Boran<sup>2,3</sup>, Yang Fan<sup>4</sup>, Wu Wenshuai<sup>5,\*</sup>, Wan Wuyi<sup>3</sup>, Zhao Wenhan<sup>2</sup>, Zhao Qianbin<sup>1,\*</sup>,

1. Center for Health Science and Engineering, Hebei Key Laboratory of Biomaterials and Smart Theranostics, School of Health Sciences and Biomedical Engineering, Hebei University of Technology, Tianjin 300131, China

2. School of School of Electrical and Electronic Engineering, Nanyang Technological University, Singapore

3. Department of Hydraulic Engineering, College of Civil Engineering and Architecture, Zhejiang University, Hangzhou 310058, P. R. China

4. College of Engineering, Peking University, Beijing 100871, China

5. Research Center for Analytical Instrumentation, Institute of Cyber-Systems and Control, State Key Laboratory of Industrial Control Technology, Zhejiang University, Hangzhou 310027, China.

\*Corresponding Authors: [wuwenshuai@zju.edu.cn](mailto:wuwenshuai@zju.edu.cn);

[qz260@uowmail.edu.au](mailto:qz260@uowmail.edu.au)

**Supplementary information: Boundary conditions of numerical model**

**Table 1.** Step1: Stationary study of Laminar flow

| Fluid properties  |                | Inlet          |                 | Outlet           | Initial value  |               | Wall    |
|-------------------|----------------|----------------|-----------------|------------------|----------------|---------------|---------|
| Density           | 997 (kg/m3)    | Flow condition | Fully developed | Pressure control | Velocity field | [u=0 v=0 w=0] | No slip |
| Dynamic viscosity | 1.0016 (mPa·S) | Flow rate      | 1000 (μL/min)   | 0 Pressure (Pa)  | Pressure       | 0             |         |

**Table 2.** Step2: Time dependent study of particle tracing

| Particle properties |                 | Releasing        |                    | Wall Condition |        | Forces     |               |
|---------------------|-----------------|------------------|--------------------|----------------|--------|------------|---------------|
| Density             | 1050 (kg/m3)    | Initial Location | Inlet, Mesh based  | Side walls     | Bounce | Drag force | Eqns. (1)-(3) |
| Diameter            | Int [1,10] (μm) | Initial velocity | Laminar flow field | Outlet         | Freeze | Lift force | Eqns. (4)(5)  |

**Supplementary information: Inertial focusing validation of the numerical model.**

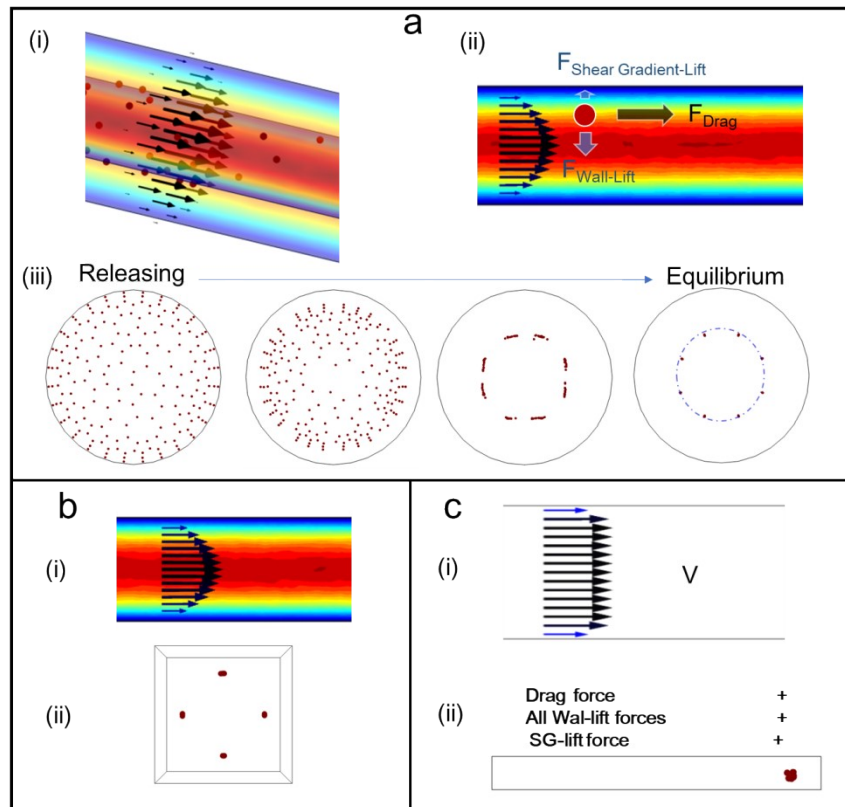

Figure S1 Numerical model validation on inertial equilibrium positions in straight microchannel. (a) Circular microchannel. *i* Velocity distribution, *ii* Hydraulic forces on a microparticle, *iii* Equilibrium positions. (b) Squared microchannel. *i* Velocity distribution, *ii* Equilibrium positions. (c) Double layered microchannel with groove arrays. *i* Velocity distribution, *ii* Equilibrium positions.

### Supplementary information: Controlling equations of hydraulic forces.

The formula to calculate drag force ( $F_d$ ) is associated with relative Reynolds number ( $Re_r$ )<sup>1</sup>, which can be estimated by Eqn. (1):

$$F_d = \frac{m_p (\mathbf{u} - \mathbf{v})}{\tau_p} \quad (1)$$

$$\tau_p = \frac{\rho_p (P_d^2)}{18\mu} \quad (2)$$

$$Re_r = \frac{\rho \|\mathbf{u} - \mathbf{v}\| P_d}{\mu} \quad (3)$$

where  $\rho$  is the density of fluid,  $\mathbf{u}$  is the fluid velocity vector,  $\mathbf{v}$  is the particle velocity vector,  $P_d$  is the diameter of particle, and  $\mu$  is the viscosity of fluid. In this study, the density of fluid (DI water), was 1000 kg/m<sup>3</sup>. The maximum magnitude of velocity was around 1E0 m/s. The particle diameter was in E-6 order of meter, and the viscosity of DI water was considered as 1 mPa·s. Hence the relative Reynolds number was less than 1, where the Stokes Drag Law was applicable, expressed as Eqns. (2)&(3)<sup>1</sup>.  $m_p$  is the mass of particle,  $\tau_p$  is the particle velocity response time, and  $\rho_p$  is the density of particle (1050 kg/m<sup>3</sup>). The calculation of Wall-Lift force ( $F_L$ ) was solved by the Eqn. (4)<sup>2</sup>:

$$F_L = \rho \frac{P_d^4}{4D^2} \alpha [\alpha G_1(s) + \beta G_2(s)] \mathbf{n} \quad (4)$$

where  $D$  is the distance between the channel walls,  $G_1$  and  $G_2$  are functions of nondimensionalized wall distance  $s$  as given in ref.<sup>2</sup>,  $s$  is the nondimensionalized distance from the particle to the reference wall, divided by  $D$ .  $\mathbf{n}$  is the wall normal at the nearest point on the reference wall. Coefficients like  $\alpha$  and  $\beta$  were obtained by Eqn. (5):

$$\begin{cases} \alpha = |D(\mathbf{n} \cdot \nabla) \mathbf{v}| \\ \beta = |0.5 D^2 (\mathbf{n} \cdot \nabla)^2 \mathbf{v}| \\ \mathbf{u}_p = [I - (\mathbf{n} \otimes \mathbf{n}) \mathbf{u}] \end{cases} \quad (5)$$

where  $I$  is the dimensionless identity matrix <sup>2</sup>.

Supplementary information: Front view of  $2\mu\text{m}$  particle trajectory.

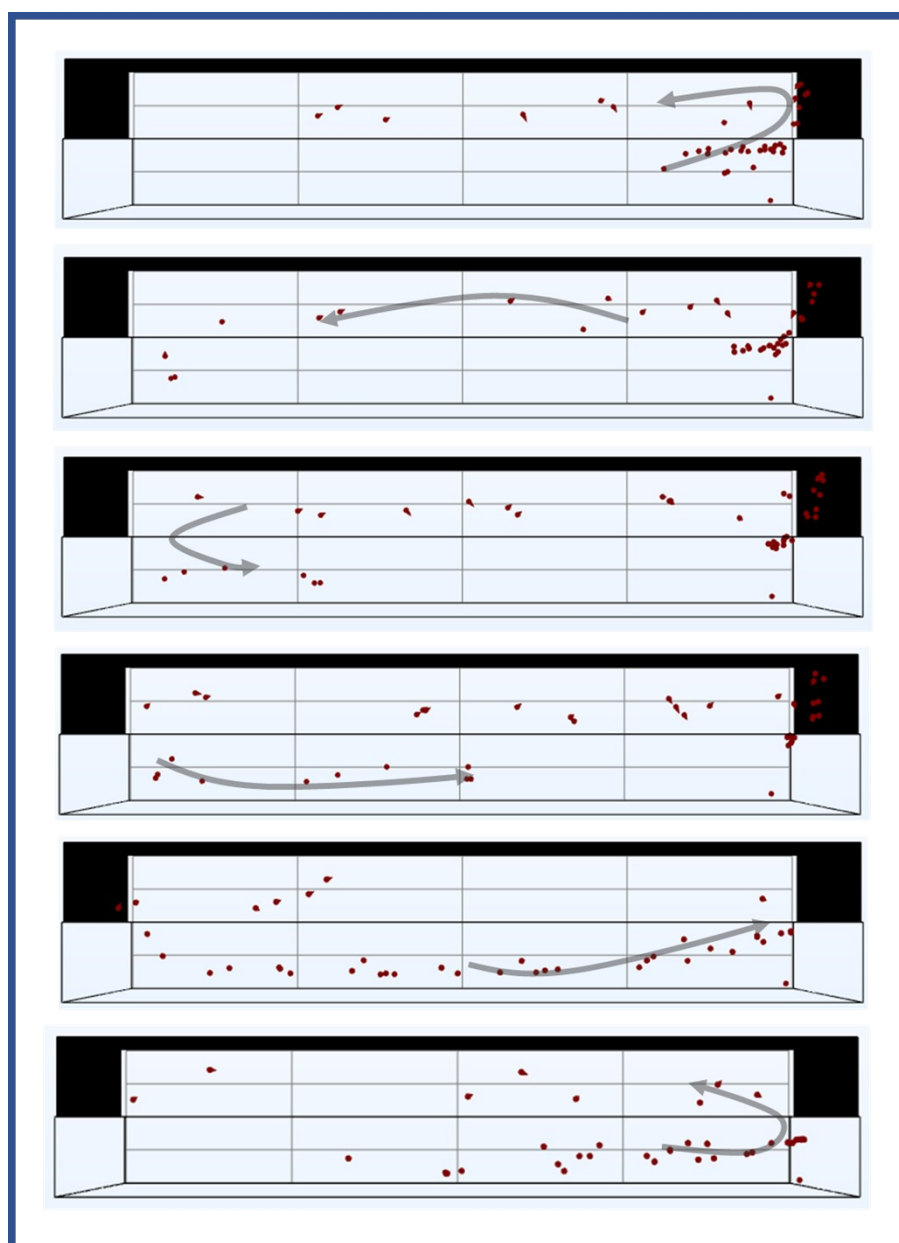

Figure S2 The trajectory of  $2\mu\text{m}$  microparticles (front view).

**References:**

1. R. Clift, J. R. Grace and M. E. Weber, *Bubbles, Drops, and Particles*, Dover Publications, Incorporated, 2013.
2. B. Ho and L. Leal, *J. Fluid Mech.*, 1974, **65**, 365-400.
